# Supplementary material for: Flow-chamber device (T-TAS) to diagnose patients suspected of platelet function defects
Source: PubMed Central journal article supplement — Blood Transfus. 2023 Feb 7;22(1):55–64. doi: 10.2450/2023.0208-22 (PMC10812895; doi:10.2450/2023.0208-22), 2024-01
Supplement: BLT-22-055_OnlineSupplementaryContent.pdf [file BLT-22-055_OnlineSupplementaryContent.pdf]

**ONLINE SUPPLEMENTARY CONTENT**

**Table S1 - Diagnosis of  $\delta$ -storage pool disease ( $\delta$ -SPD) subgroup, based on lumi-LTA or T-TAS when using as parameter the OC with cut-off >10 min**

| Patients | Diagnosis of $\delta$ -SPD by Lumi- LTA | Diagnosis of $\delta$ -SPD by T-TAS (OT >10 min) | Test agreement   |
|----------|-----------------------------------------|--------------------------------------------------|------------------|
| 1        | PFDs                                    | yes                                              | K Cohen<br>0,695 |
| 2        | PFDs                                    | no                                               |                  |
| 3        | PFDs                                    | no                                               |                  |
| 4        | PFDs                                    | no                                               |                  |
| 5        | PFDs                                    | no                                               |                  |
| 6        | PFDs                                    | no                                               |                  |
| 7        | PFDs                                    | no                                               |                  |
| 8        | PFDs                                    | no                                               |                  |
| 9        | PFDs                                    | no                                               |                  |
| 10       | PFDs                                    | no                                               |                  |
| 11       | PFDs                                    | no                                               |                  |
| 12       | PFDs                                    | no                                               |                  |
| 13       | PFDs                                    | no                                               |                  |
| 14       | PFDs                                    | no                                               |                  |
| 15       | PFDs                                    | no                                               |                  |
| 16       | PFDs                                    | no                                               |                  |
| 17       | PFDs                                    | yes                                              |                  |
| 18       | PFDs                                    | no                                               |                  |
| 19       | PFDs                                    | no                                               |                  |
| 20       | PFDs                                    | no                                               |                  |
| 21       | PFDs                                    | no                                               |                  |
| 22       | PFDs                                    | no                                               |                  |
| 23       | PFDs                                    | no                                               |                  |
| 24       | PFDs                                    | no                                               |                  |
| 25       | PFDs                                    | no                                               |                  |
| 26       | PFDs                                    | yes                                              |                  |
| 27       | PFDs                                    | no                                               |                  |
| 28       | PFDs                                    | no                                               |                  |
| 29       | PFDs                                    | no                                               |                  |
| 30       | PFDs                                    | no                                               |                  |
| 31       | PFDs                                    | no                                               |                  |
| 32       | PFDs                                    | no                                               |                  |
| 33       | PFDs                                    | no                                               |                  |
| 34       | PFDs                                    | no                                               |                  |
| 35       | PFDs                                    | no                                               |                  |
| 36       | PFDs                                    | no                                               |                  |
| 37       | PFDs                                    | no                                               |                  |
| 38       | PFDs                                    | no                                               |                  |
| 39       | PFDs ( $\delta$ -SPD)                   | yes                                              |                  |
| 40       | PFDs ( $\delta$ -SPD)                   | no                                               |                  |
| 41       | PFDs ( $\delta$ -SPD)                   | no                                               |                  |
| 42       | PFDs ( $\delta$ -SPD)                   | yes                                              |                  |
| 43       | PFDs ( $\delta$ -SPD)                   | yes                                              |                  |
| 44       | PFDs ( $\delta$ -SPD)                   | yes                                              |                  |
| 45       | PFDs ( $\delta$ -SPD)                   | yes                                              |                  |
| 46       | PFDs ( $\delta$ -SPD)                   | yes                                              |                  |
| 47       | PFDs ( $\delta$ -SPD)                   | yes                                              |                  |
| 48       | PFDs ( $\delta$ -SPD)                   | Yes                                              |                  |

Test agreement (lumi-LTA-vs-T-TAS) is also reported. Significance of K Choen value: <0, no agreement; 0-0.4, poor agreement; 0.4-0.6, discrete agreement.

**Table SII - Response to antiplatelet therapy for patients on treatment when tested by lumi-LTA and T-TAS and between-test agreement**

| Response to antiplatelet therapy |                 |                 |                |
|----------------------------------|-----------------|-----------------|----------------|
| Patients                         | Lumi-LTA        | T-TAS           | Test agreement |
| 1                                | absent          | complete        | K Cohen=0.150  |
| 2                                | partial         | absent          |                |
| 3                                | <b>absent</b>   | <b>absent</b>   |                |
| 4                                | partial         | absent          |                |
| 5                                | absent          | complete        |                |
| 6                                | absent          | complete        |                |
| 7                                | <b>complete</b> | <b>complete</b> |                |
| 8                                | <b>absent</b>   | <b>absent</b>   |                |
| 9                                | <b>absent</b>   | <b>absent</b>   |                |
| 10                               | <b>complete</b> | <b>complete</b> |                |
| 11                               | complete        | absent          |                |
| 12                               | <b>complete</b> | <b>complete</b> |                |
| 13                               | <b>complete</b> | <b>complete</b> |                |
| 14                               | complete        | absent          |                |
| 15                               | <b>complete</b> | <b>complete</b> |                |
| 16                               | <b>complete</b> | <b>complete</b> |                |
| 17                               | <b>complete</b> | <b>complete</b> |                |
| 18                               | partial         | complete        |                |
| 19                               | partial         | complete        |                |
| 20                               | partial         | complete        |                |
| 21                               | <b>complete</b> | <b>complete</b> |                |
| 22                               | <b>complete</b> | <b>complete</b> |                |
| 23                               | complete        | absent          |                |
| 24                               | <b>complete</b> | <b>complete</b> |                |
| 25                               | <b>complete</b> | <b>complete</b> |                |
| 26                               | complete        | Absent          |                |

**Complete response:** Percent LTA below the 5<sup>th</sup> centile of the distribution of healthy subjects. T-TAS AUC, below the 5<sup>th</sup> centile; OT, OST above the 95<sup>th</sup> centile of the distribution of controls. **Absent response:** Percent LTA above the 5<sup>th</sup> centile of the distribution of healthy subjects. T-TAS AUC higher than the 5<sup>th</sup> centile; OT, OST smaller the 95<sup>th</sup> centile of the distribution of controls. For the significance of K Choen values, see legend to Table III.
